# Supplementary material
Source: PubMed Central journal article supplement (PMC1347991)

(monomer A)

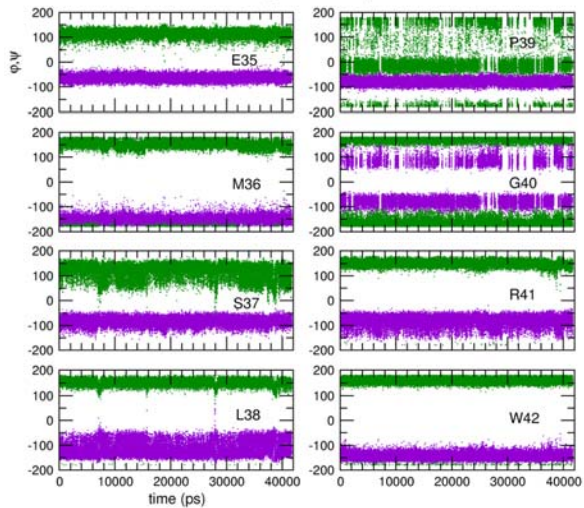

(monomer B)

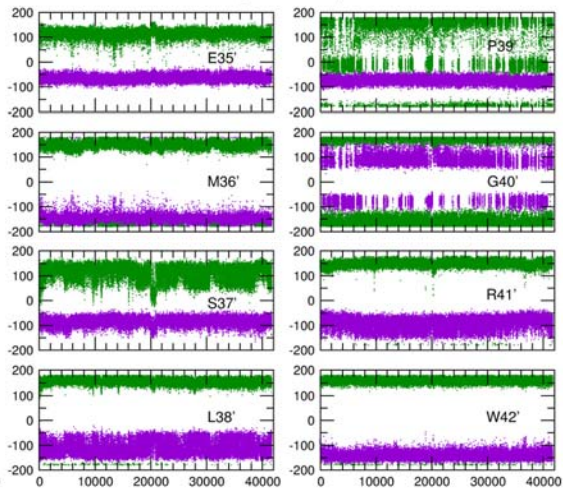

Supplement: pnas_0508452103_4.pdf [file pnas_0508452103_4.pdf]
